# Supplementary material for: Molecular electrostatic potential and volume-aided drug design based on the isoindolinone-containing cyclopeptide S-PK6
Source: Royal Society of Chemistry journal article supplement (doi:10.1039/d3nj01202f), 2023-01-01
Supplement: d3nj01202f1.pdf [file d3nj01202f1.pdf]

## *Supporting Information*

# Molecular electrostatic potential and volume-aided drug design based on an isoindolinone-containing cyclopeptide S-PK6

Lei Zhao†, Tingting Li†, Hongyu Xu, Xiong Zhang, Huiming Lin, Na Liu, Yingxue Jin

\* and Zhiqiang Wang\*.

Key Laboratory for Photonic and Electronic Bandgap Materials, Ministry of Education, College of Chemistry & Chemical Engineering, Harbin Normal University, Harbin, 150025, China.

**\*Corresponding author.** E-mail addresses: [wzqprof@163.com](mailto:wzqprof@163.com) (Z. Wang), [jyxprof@163.com](mailto:jyxprof@163.com) (Y Jin).

<sup>†</sup> Lei Zhao and Tingting Li contributed equally to this work.

| <b>Content</b>                                                                                                                                                                                                                                              | <b>Page</b> |
|-------------------------------------------------------------------------------------------------------------------------------------------------------------------------------------------------------------------------------------------------------------|-------------|
| <b>Table S1.</b> Electrostatic potential distribution diagram of compound <b>1</b> (S-PK6).                                                                                                                                                                 | <b>S3</b>   |
| <b>Fig.S1.</b> Distribution of the surface electrostatic potential of compound <b>1</b> (S-PK6) with numbered atoms. The blue points with pink numbers represent the minimum extreme, and the red points with green number represent the maximum extreme.   | <b>S3</b>   |
| <b>Table S2.</b> Electrostatic potential distribution diagram of compound <b>2</b> .                                                                                                                                                                        | <b>S4</b>   |
| <b>Fig.S2.</b> Distribution of the surface electrostatic potential extreme of compound <b>2</b> with numbered atoms. The blue points with pink numbers represent the minimum extreme, and the red points with green number represent the maximum extreme.   | <b>S4</b>   |
| <b>Table S3.</b> Electrostatic potential distribution diagram of compound <b>3</b> .                                                                                                                                                                        | <b>S5</b>   |
| <b>Fig.S3.</b> Distribution of the surface electrostatic potential extreme of compound <b>3</b> with numbered atoms. The blue points with pink numbers represent the minimum extreme, and the red points with green numbers represent the maximum extreme.  | <b>S5</b>   |
| <b>Fig.S4.</b> The 3D molecular docking between compounds <b>4</b> (A), <b>5</b> (B), <b>6</b> (C), <b>7</b> (D), <b>8</b> (E), and <b>9</b> (F) with MDM2.                                                                                                 | <b>S6</b>   |
| <b>Fig.S5.</b> The 2D molecular docking sites for compounds <b>4</b> (A), <b>5</b> (B), <b>6</b> (C), <b>7</b> (D), <b>8</b> (E), and <b>9</b> (F).                                                                                                         | <b>S7</b>   |
| <b>Fig.S6.</b> The 3D molecular docking for compounds <b>11</b> (A), <b>12</b> (B), <b>13</b> (C), <b>14</b> (D), <b>15</b> (E), <b>16</b> (F), <b>17</b> (G), and <b>18</b> (H).                                                                           | <b>S8</b>   |
| <b>Fig.S7.</b> The 2D molecular docking sites for compounds <b>11</b> (A), <b>12</b> (B), <b>13</b> (C), <b>14</b> (D), <b>15</b> (E), <b>16</b> (F), <b>17</b> (G), and <b>18</b> (H).                                                                     | <b>S9</b>   |
| <b>Fig.S8.</b> The 3D molecular docking between compounds <b>19</b> (A), <b>20</b> (B), <b>21</b> (C), <b>22</b> (D), <b>23</b> (E), and <b>24</b> (F) with MDM2.                                                                                           | <b>S10</b>  |
| <b>Fig.S9.</b> The 2D molecular docking sites between compounds <b>19</b> (A), <b>20</b> (B), <b>21</b> (C), <b>22</b> (D), <b>23</b> (E), and <b>24</b> (F) with MDM2.                                                                                     | <b>S11</b>  |
| <b>Fig.S10.</b> Distribution of the surface electrostatic potential extreme of compound <b>19</b> with numbered atoms. The blue points with pink numbers represent the minimum extreme, and the red points with green number represent the maximum extreme. | <b>S12</b>  |
| <b>Table S4.</b> Electrostatic potential distribution diagram of compound <b>19</b> .                                                                                                                                                                       | <b>S12</b>  |
| <b>Fig.S11.</b> Distribution of the surface electrostatic potential extreme of compound <b>20</b> with numbered atoms. The blue points with pink numbers represent the minimum extreme, and the red points with green number represent the maximum extreme. | <b>S13</b>  |
| <b>Table S5.</b> Electrostatic potential distribution diagram of compound <b>20</b> .                                                                                                                                                                       | <b>S13</b>  |
| <b>Table S6.</b> Docking process parameter settings for those with relative high binding energy.                                                                                                                                                            | <b>S14</b>  |
| <b>Table S7.</b> Drug-likeness prediction of compounds <b>1-24</b>                                                                                                                                                                                          | <b>S15</b>  |

**Table S1.** Electrostatic potential distribution extreme of compound **1** (S-PK6).

| Number of surface minima | Potential (kcal·mol <sup>-1</sup> ) | Number of surface maxima | Potential (kcal·mol <sup>-1</sup> ) | Number of surface maxima | Potential (kcal·mol <sup>-1</sup> ) |
|--------------------------|-------------------------------------|--------------------------|-------------------------------------|--------------------------|-------------------------------------|
| 1                        | -12.18                              | 1                        | 14.69                               | 20                       | -13.21                              |
| 2                        | -22.58                              | 2                        | 16.249                              | 21                       | 3.01                                |
| 3                        | -56.01                              | 3                        | 45.71                               | 22                       | 11.69                               |
| 4                        | -22.11                              | 4                        | 11.29                               | 23                       | -22.29                              |
| 5                        | 19.04                               | 5                        | 13.05                               | 24                       | 5.68                                |
| 6                        | -50.26                              | 6                        | 9.72                                | 25                       | 7.82                                |
| 7                        | 2.34                                | 7                        | 21.24                               | 26                       | -24.19                              |
| 8                        | -30.23                              | 8                        | 21.06                               | 27                       | 10.25                               |
| 9                        | -37.963                             | 9                        | -23.02                              | 28                       | 32.25                               |
| 10                       | -39.26                              | 10                       | 12.14                               | <b>* 29</b>              | 52.04                               |
| 11                       | 5.66                                | 11                       | 22.92                               | 30                       | 21.70                               |
| 12                       | -48.61                              | 12                       | 3.86                                | 31                       | 10.87                               |
| 13                       | -5.30                               | 13                       | 20.32                               | 32                       | 29.70                               |
| <b>*14</b>               | -64.19                              | 14                       | 4.75                                | 33                       | 2.35                                |
| 15                       | -33.459                             | 15                       | 19.06                               | 34                       | 12.30                               |
| 16                       | 29.61                               | 16                       | -0.95                               | 35                       | 15.48                               |
| 17                       | 24.57                               | 17                       | 11.18                               | 36                       | 21.96                               |
| 18                       | 8.05                                | 18                       | -26.68                              | 37                       | 14.54                               |
|                          |                                     | 19                       | -30.99                              |                          |                                     |

Note: The values in bold with \* indicate the maximum or minimum extreme values

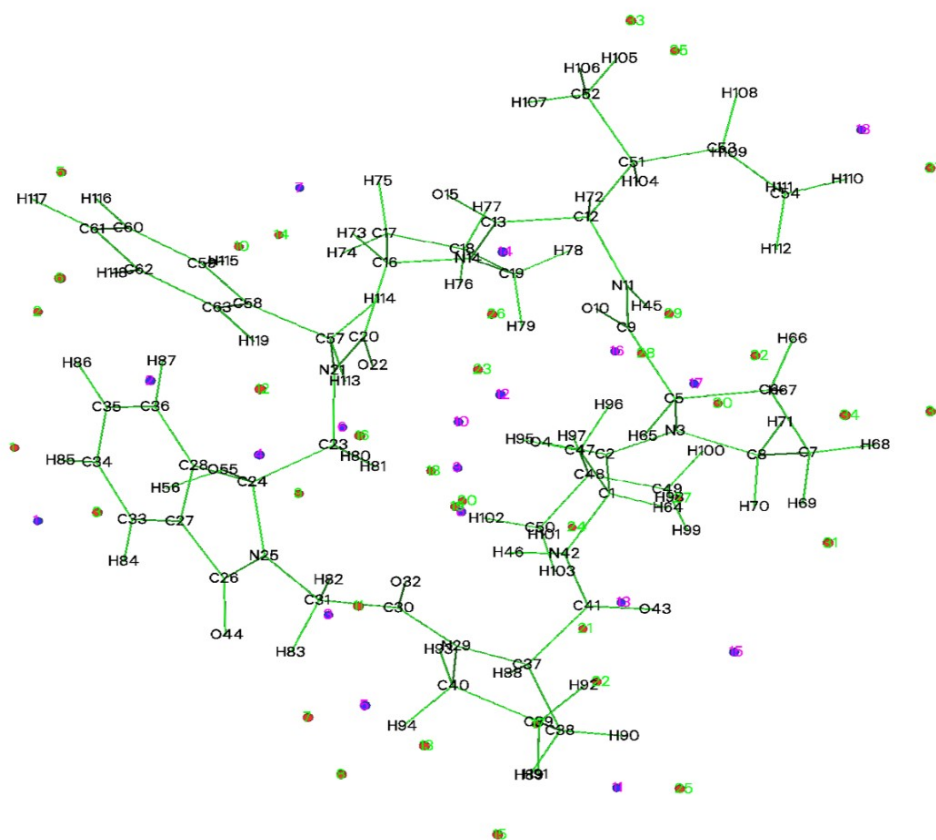

**Fig.S1.** Distribution of the surface electrostatic potential of compound **1** (S-PK6) with numbered atoms. The

blue points with pink numbers represent the minimum extreme, and the red points with green number represent the maximum extreme.

**Table S2.** Electrostatic potential distribution diagram of compound **2**.

| Number of surface minima | Potential (kcal·mol <sup>-1</sup> ) | Number of surface maxima | Potential (kcal·mol <sup>-1</sup> ) | Number of surface maxima | Potential (kcal·mol <sup>-1</sup> ) |
|--------------------------|-------------------------------------|--------------------------|-------------------------------------|--------------------------|-------------------------------------|
| <b>1</b>                 | -7.78                               | <b>1</b>                 | 15.39                               | <b>22</b>                | -3.60                               |
| <b>2</b>                 | -10.43                              | <b>2</b>                 | 15.84                               | <b>23</b>                | 7.64                                |
| <b>3</b>                 | -2.60                               | <b>3</b>                 | 22.04                               | <b>24</b>                | 8.39                                |
| <b>4</b>                 | -21.45                              | <b>4</b>                 | 15.58                               | <b>25</b>                | 0.03                                |
| <b>5</b>                 | -4.64                               | <b>5</b>                 | 15.58                               | <b>26</b>                | 12.58                               |
| <b>6</b>                 | -49.93                              | <b>6</b>                 | 18.75                               | <b>27</b>                | -1.78                               |
| <b>7</b>                 | -59.07                              | <b>* 7</b>               | 52.53                               | <b>28</b>                | -9.49                               |
| <b>8</b>                 | 6.77                                | <b>8</b>                 | 17.44                               | <b>29</b>                | 4.44                                |
| <b>*9</b>                | -59.80                              | <b>9</b>                 | 6.36                                | <b>30</b>                | 10.09                               |
| <b>10</b>                | -9.65                               | <b>10</b>                | 10.12                               | <b>31</b>                | -2.44                               |
| <b>11</b>                | -43.94                              | <b>11</b>                | 9.86                                | <b>32</b>                | 8.99                                |
| <b>12</b>                | -1.49                               | <b>12</b>                | 7.03                                | <b>33</b>                | 10.31                               |
| <b>13</b>                | 5.41                                | <b>13</b>                | 6.79                                | <b>34</b>                | 8.81                                |
| <b>14</b>                | -38.76                              | <b>14</b>                | -0.13                               | <b>35</b>                | -0.61                               |
| <b>15</b>                | 0.47                                | <b>15</b>                | 2.24                                | <b>36</b>                | 10.77                               |
|                          |                                     | <b>16</b>                | -3.34                               | <b>37</b>                | 9.53                                |
|                          |                                     | <b>17</b>                | 10.30                               | <b>38</b>                | 4.16                                |
|                          |                                     | <b>18</b>                | 7.29                                | <b>39</b>                | 2.18                                |
|                          |                                     | <b>19</b>                | -36.19                              | <b>40</b>                | 33.60                               |
|                          |                                     | <b>20</b>                | 11.54                               | <b>41</b>                | 12.67                               |
|                          |                                     | <b>21</b>                | 8.46                                | <b>42</b>                | 11.88                               |

Note: The value in bold with \* indicates the maximum or minimum value

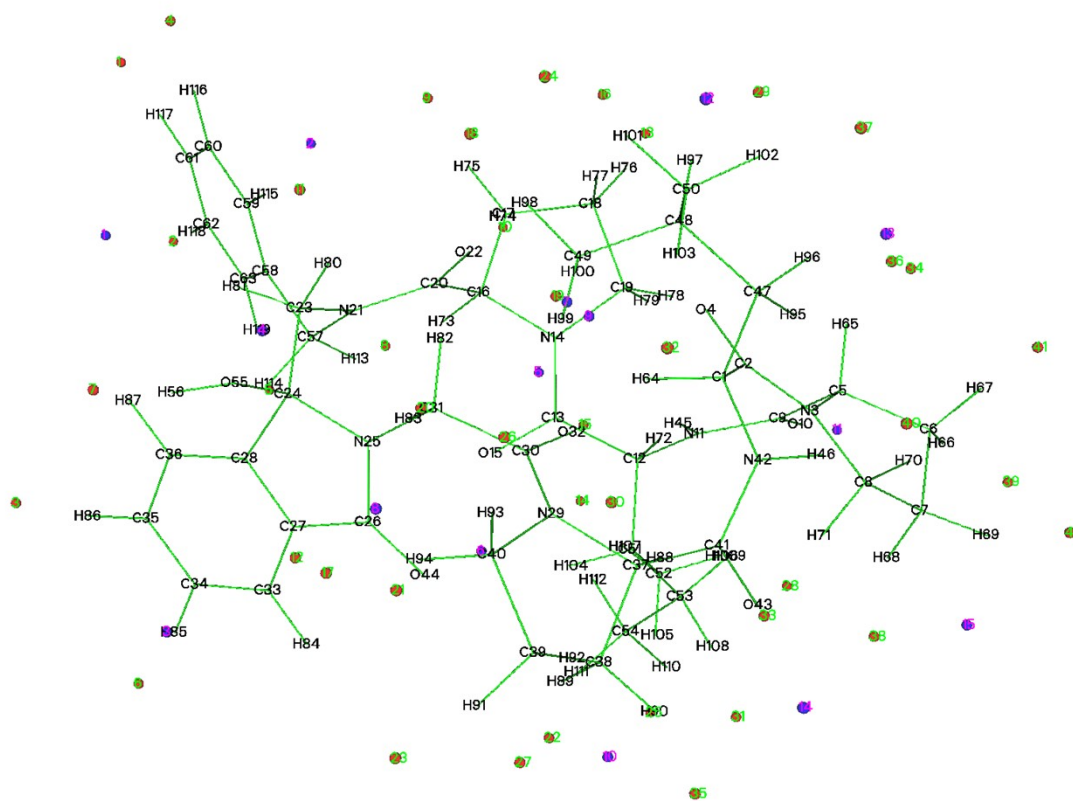

**Fig.S2.** Distribution of the surface electrostatic potential extreme of compound **2** with numbered atoms. The blue points with pink numbers represent the minimum extreme, and the red points with green number represent the maximum extreme.

**Table S3.** Electrostatic potential distribution diagram of compound **3**.

| Number of surface minima | Potential (kcal·mol <sup>-1</sup> ) | Number of surface maxima | Potential (kcal·mol <sup>-1</sup> ) | Number of surface maxima | Potential (kcal·mol <sup>-1</sup> ) |
|--------------------------|-------------------------------------|--------------------------|-------------------------------------|--------------------------|-------------------------------------|
| <b>1</b>                 | -14.09                              | <b>1</b>                 | 13.77                               | <b>25</b>                | 19.20                               |
| <b>2</b>                 | -11.27                              | <b>2</b>                 | 13.60                               | <b>*26</b>               | 34.89                               |
| <b>3</b>                 | 6.52                                | <b>3</b>                 | 13.50                               | <b>27</b>                | -6.88                               |
| <b>4</b>                 | -2.54                               | <b>4</b>                 | 10.62                               | <b>28</b>                | -15.33                              |
| <b>5</b>                 | -12.09                              | <b>5</b>                 | 9.55                                | <b>29</b>                | 16.60                               |
| <b>6</b>                 | -1.77                               | <b>6</b>                 | 12.49                               | <b>30</b>                | 17.44                               |
| <b>7</b>                 | -1.77                               | <b>7</b>                 | 4.24                                | <b>31</b>                | 15.50                               |
| <b>8</b>                 | -47.38                              | <b>8</b>                 | 10.72                               | <b>32</b>                | 2.75                                |
| <b>9</b>                 | 9.84                                | <b>9</b>                 | 10.99                               | <b>33</b>                | 16.28                               |
| <b>10</b>                | -32.09                              | <b>10</b>                | 7.12                                | <b>34</b>                | -2.29                               |
| <b>11</b>                | 10.99                               | <b>11</b>                | -0.58                               | <b>35</b>                | -1.11                               |
| <b>*12</b>               | -55.87                              | <b>12</b>                | 12.67                               | <b>36</b>                | 15.67                               |
| <b>13</b>                | -3.97                               | <b>13</b>                | 10.83                               | <b>37</b>                | 14.64                               |
| <b>14</b>                | -40.75                              | <b>14</b>                | 14.83                               | <b>38</b>                | 11.83                               |
| <b>15</b>                | 14.89                               | <b>15</b>                | 10.72                               | <b>39</b>                | 2.22                                |
| <b>16</b>                | -30.03                              | <b>16</b>                | 12.09                               | <b>40</b>                | 2.26                                |
| <b>17</b>                | 8.12                                | <b>17</b>                | -6.35                               | <b>41</b>                | 0.38                                |
| <b>18</b>                | -7.07                               | <b>18</b>                | 18.65                               | <b>42</b>                | 7.00                                |
| <b>19</b>                | -5.28                               | <b>19</b>                | 5.54                                | <b>43</b>                | 0.81                                |
| <b>20</b>                | 0.85                                | <b>20</b>                | 7.02                                | <b>44</b>                | 8.98                                |
| <b>21</b>                | -36.27                              | <b>21</b>                | -18.06                              | <b>45</b>                | 4.13                                |
|                          |                                     | <b>22</b>                | 8.21                                | <b>46</b>                | 2.82                                |
|                          |                                     | <b>23</b>                | 4.69                                | <b>47</b>                | 3.30                                |
|                          |                                     | <b>24</b>                | 7.39                                |                          |                                     |

Note: The value in bold with \* indicates the maximum or minimum value

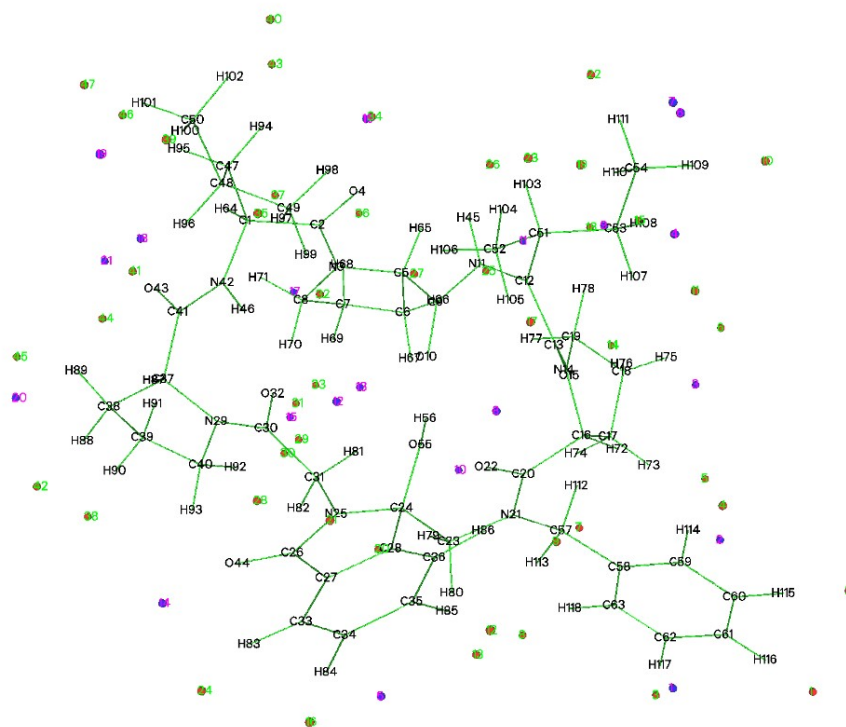

**Fig.S3.** Distribution of the surface electrostatic potential extreme of compound **3** with numbered atoms. The blue points with pink numbers represent the minimum extreme, and the red points with green numbers represent the maximum extreme.

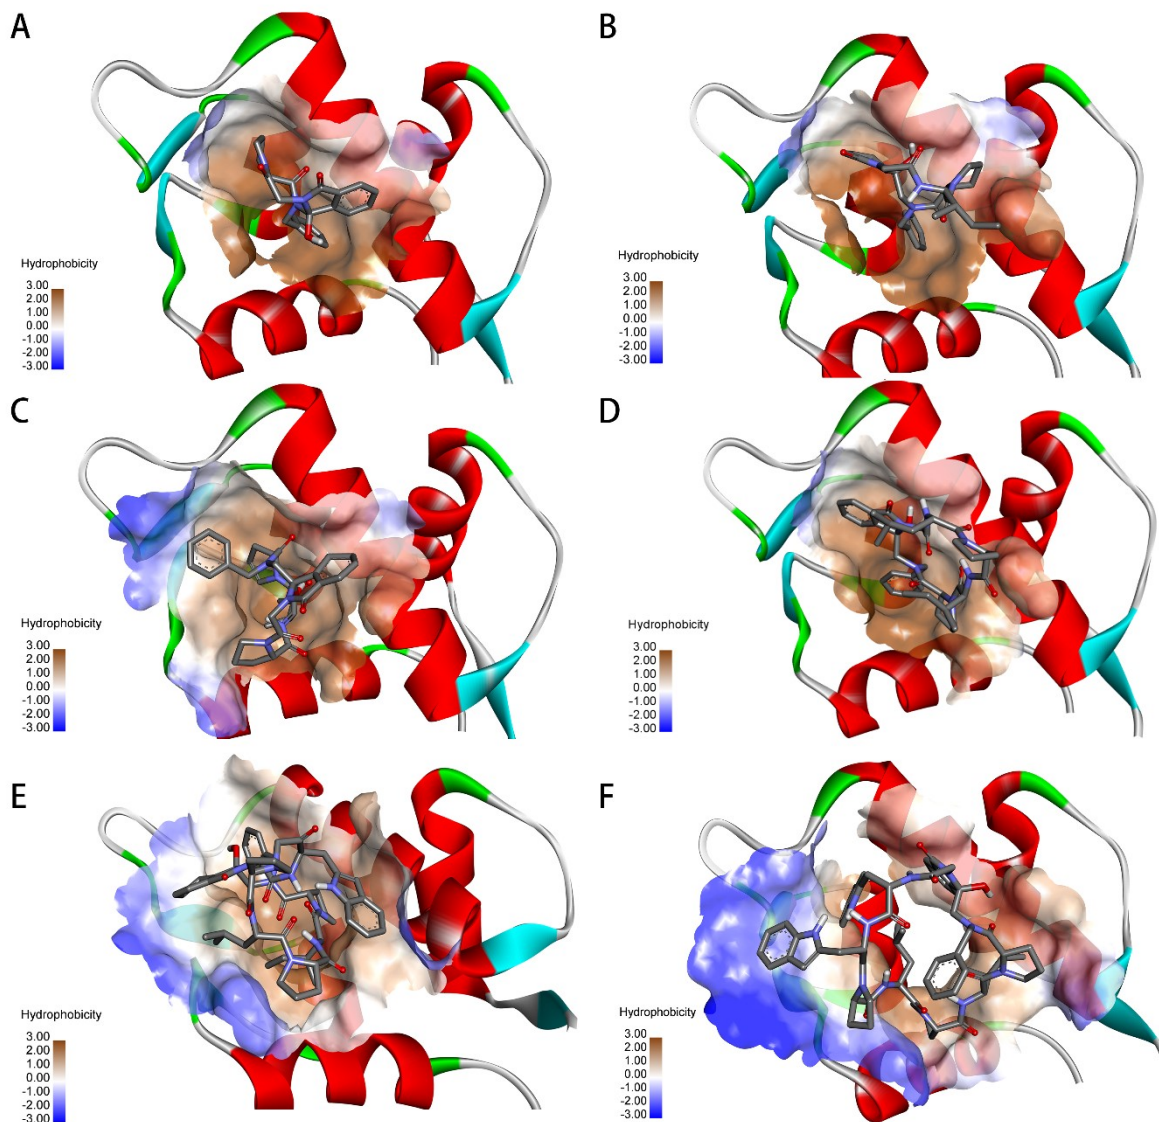

**Fig.S4.** The three-dimensional (3D) molecular docking between compounds **4(A)**, **5(B)**, **6(C)**, **7(D)**, **8(E)**, and **9(F)** with MDM2.

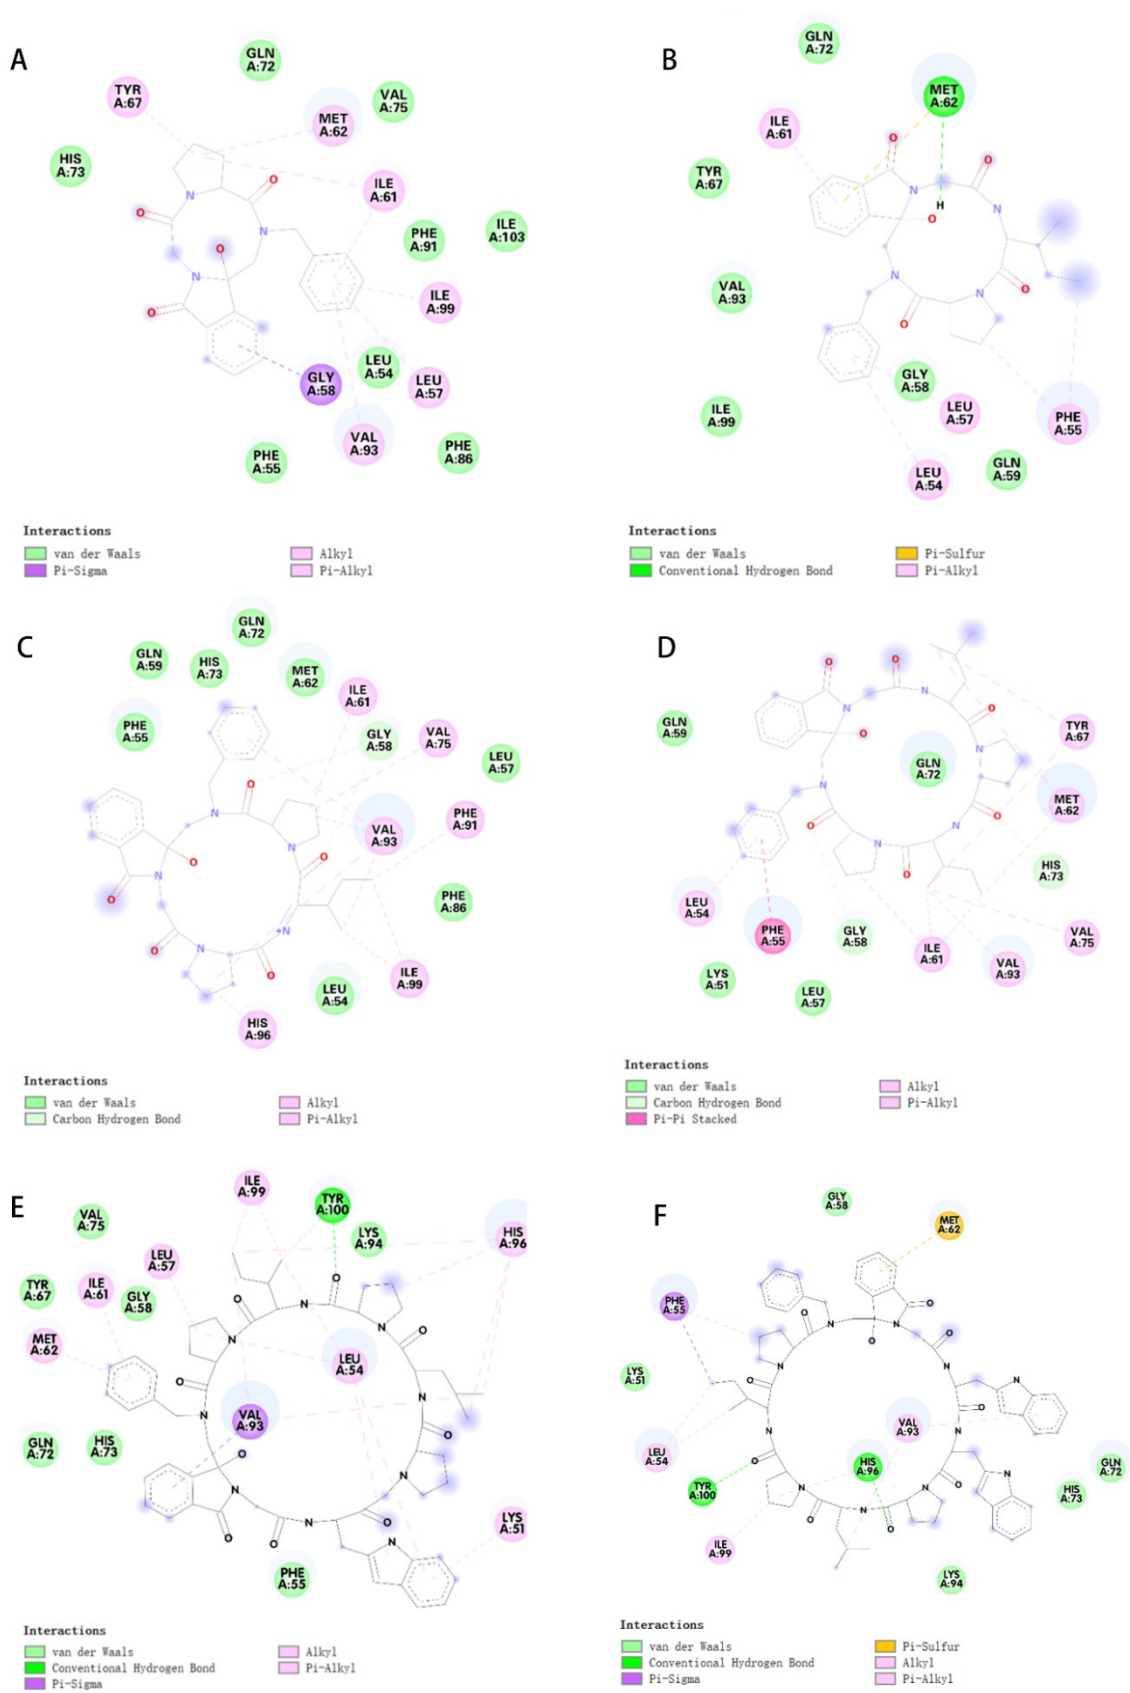

**Fig.S5.** The 2D molecular docking sites between compounds 4(A), 5(B), 6(C), 7(D), 8(E), and 9(F) with MDM2.

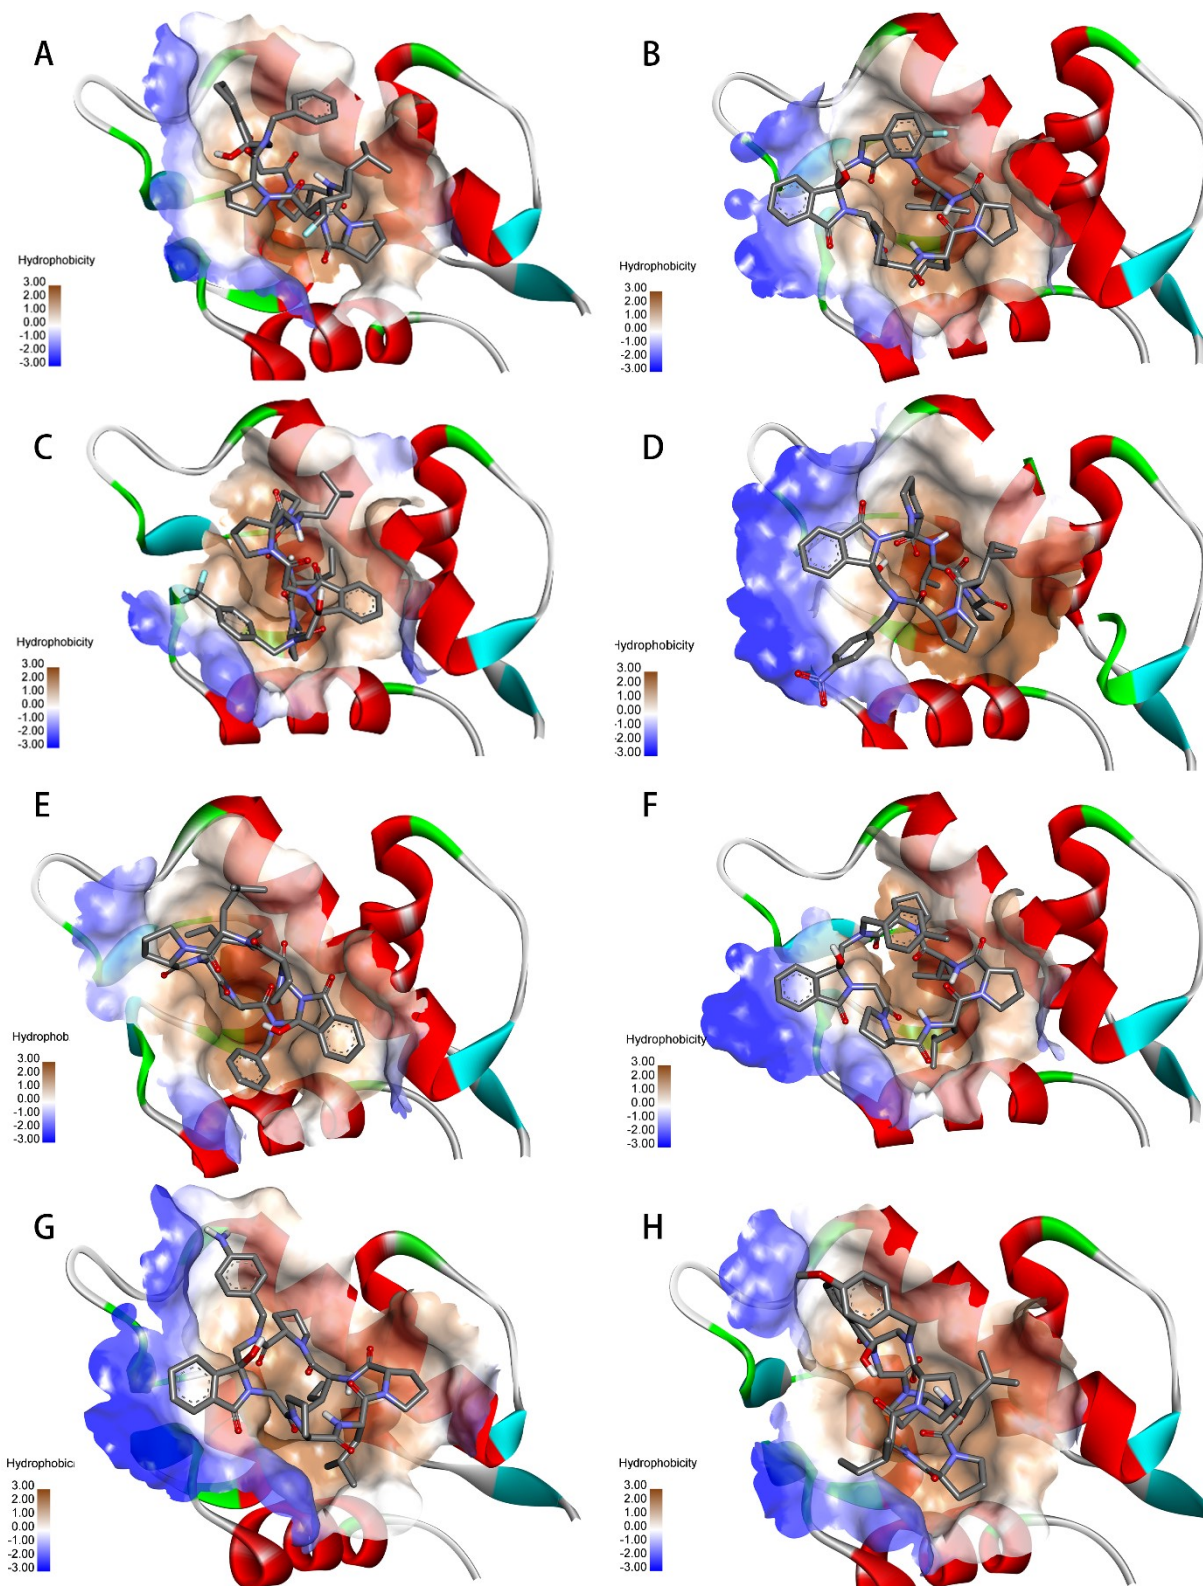

**Fig.S6.** The three-dimensional (3D) molecular docking between compounds 11(A), 12(B), 13(C), 14(D), 15(E), 16(F), 17(G), and 18(H) with MDM2.



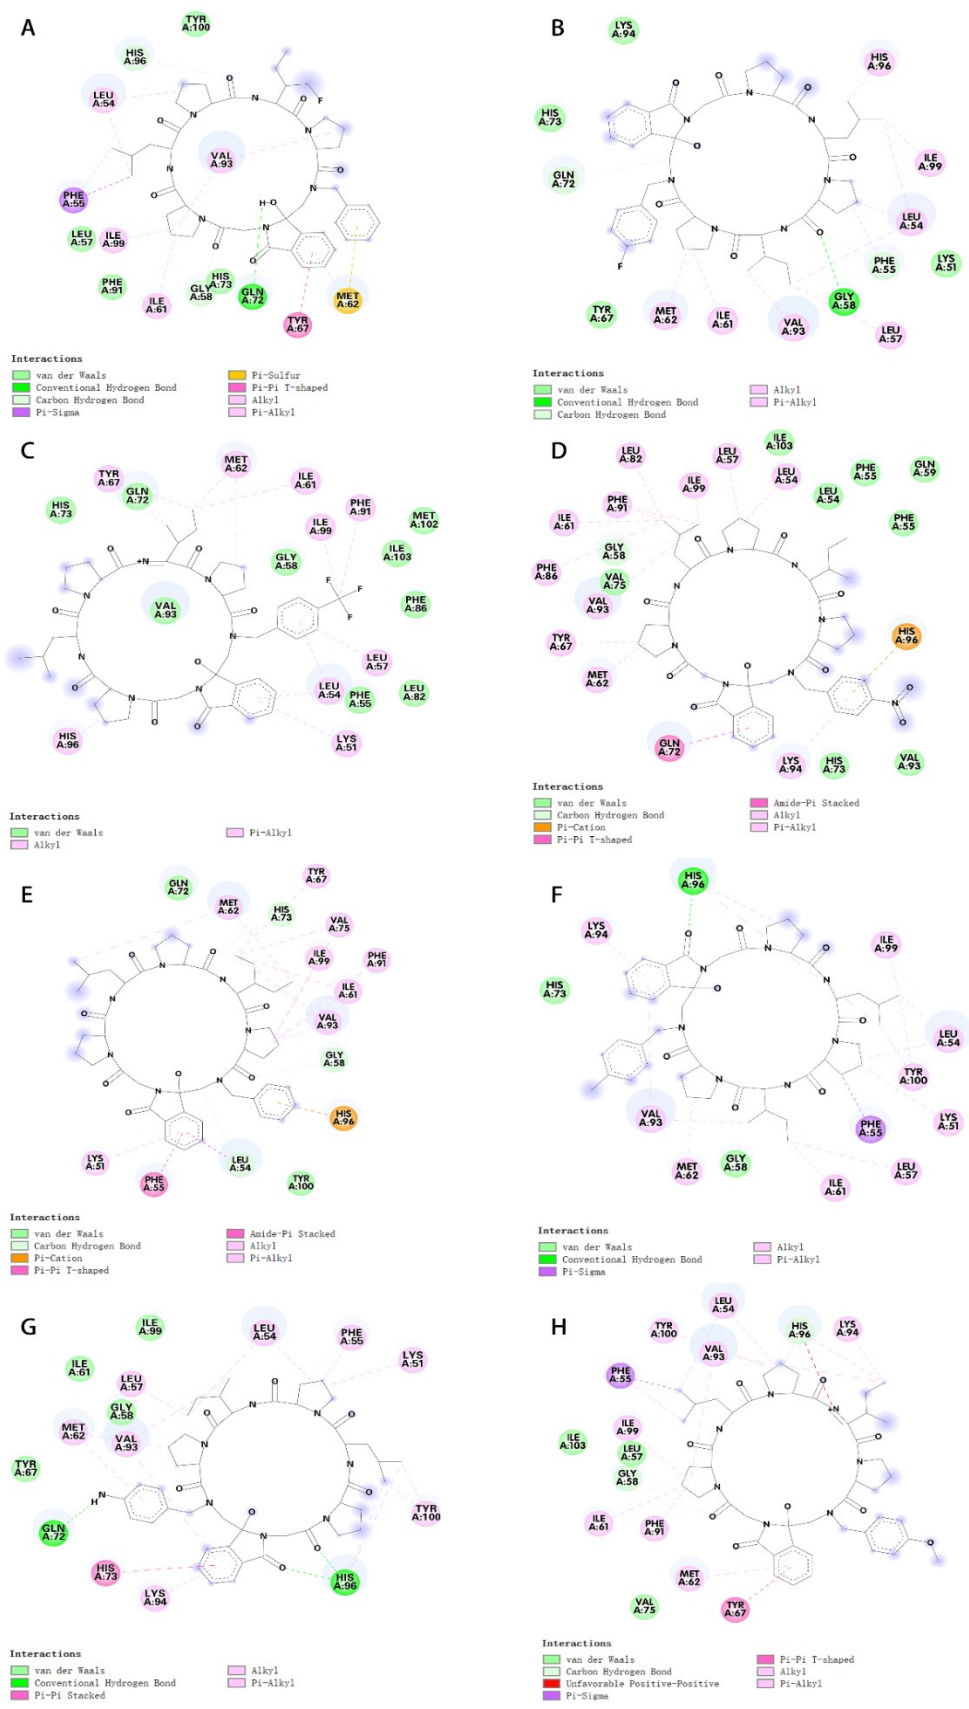

**Fig.S7.** The two-dimensional (2D) molecular docking sites between compounds 11(A), 12(B), 13(C), 14(D), 15(E), 16(F), 17(G), and 18(H) with MDM2.

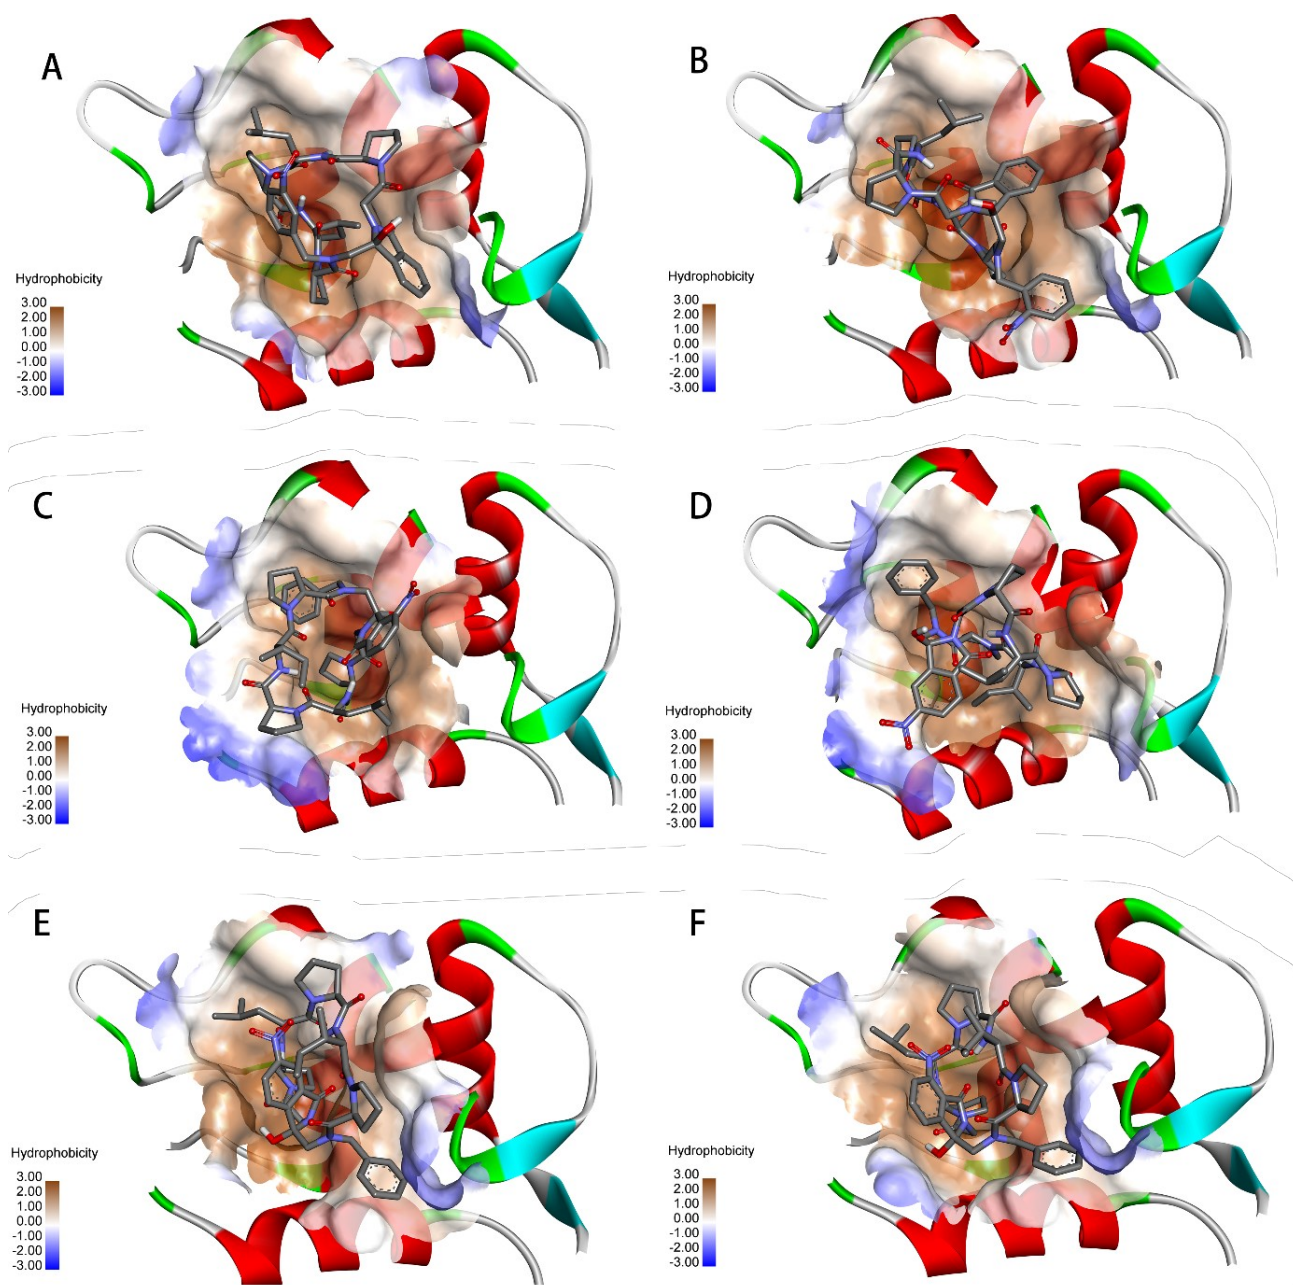

**Fig.S8.** The three-dimensional (3D) molecular docking between compounds **19**(A), **20**(B), **21**(C), **22**(D), **23**(E), and **24**(F) with MDM2.

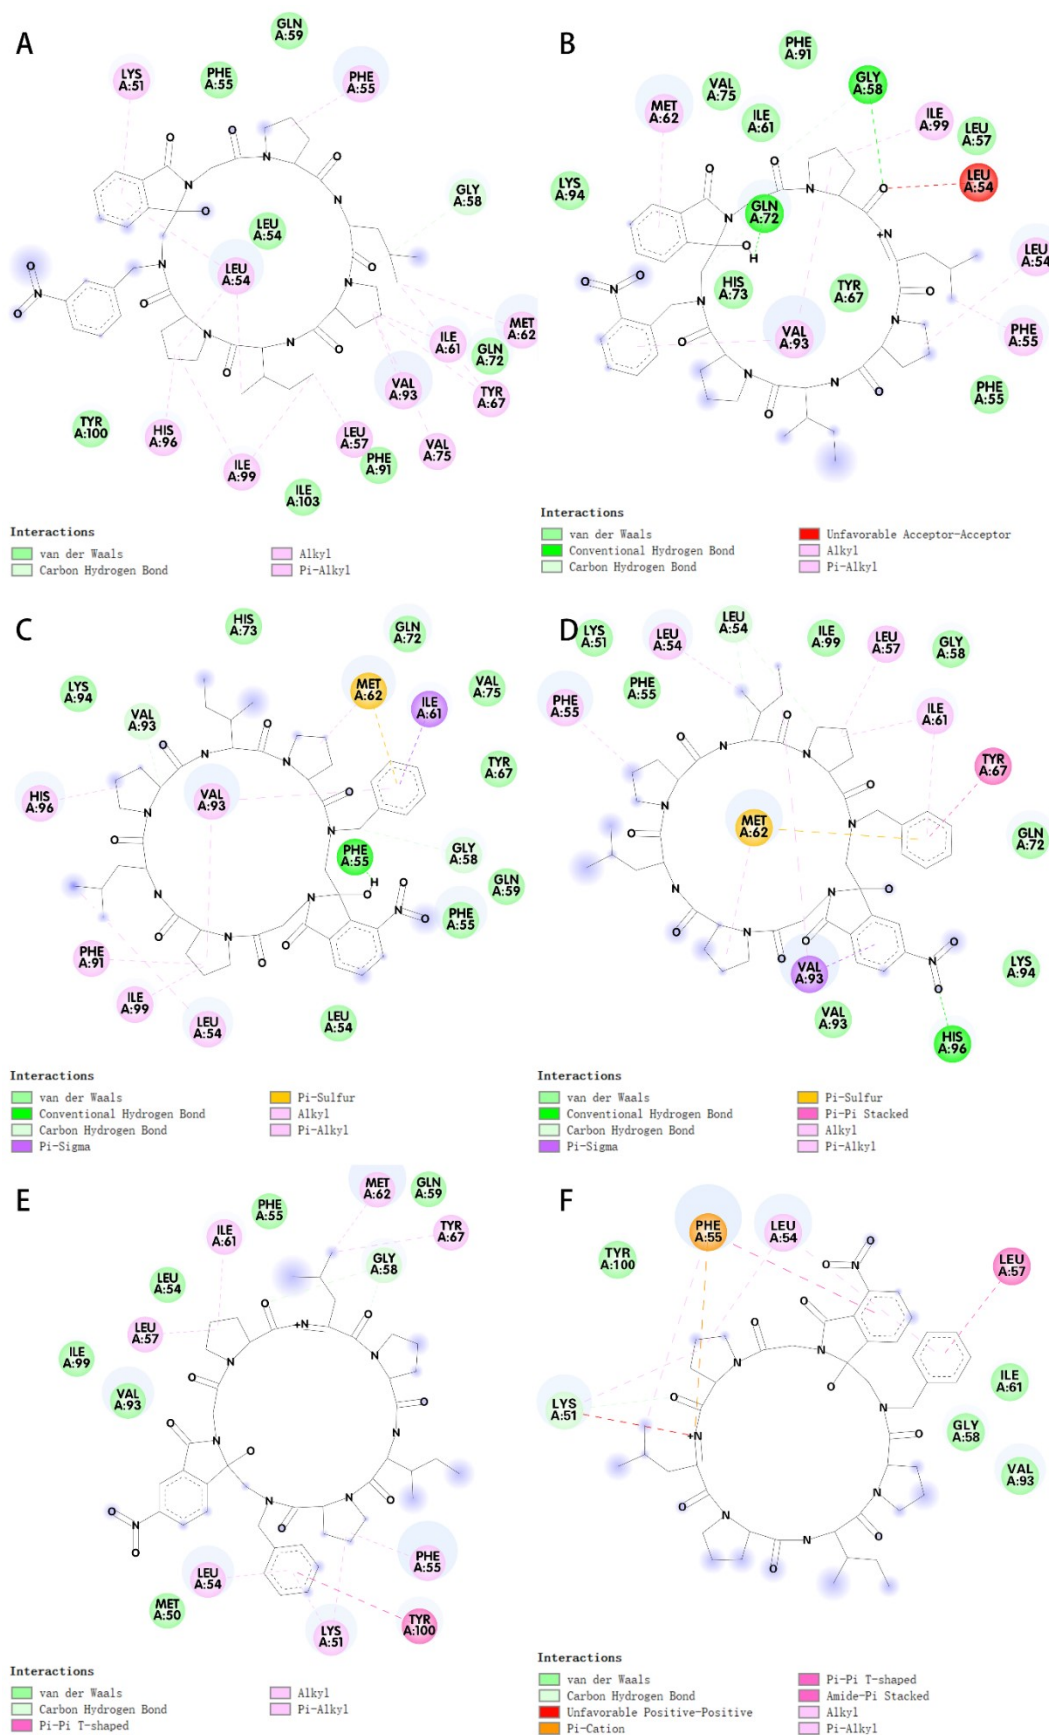

**Fig.S9.** The two-dimensional (2D) molecular docking sites between compounds 19(A), 20(B), 21(C), 22(D), 23(E), and 24(F) with MDM2.

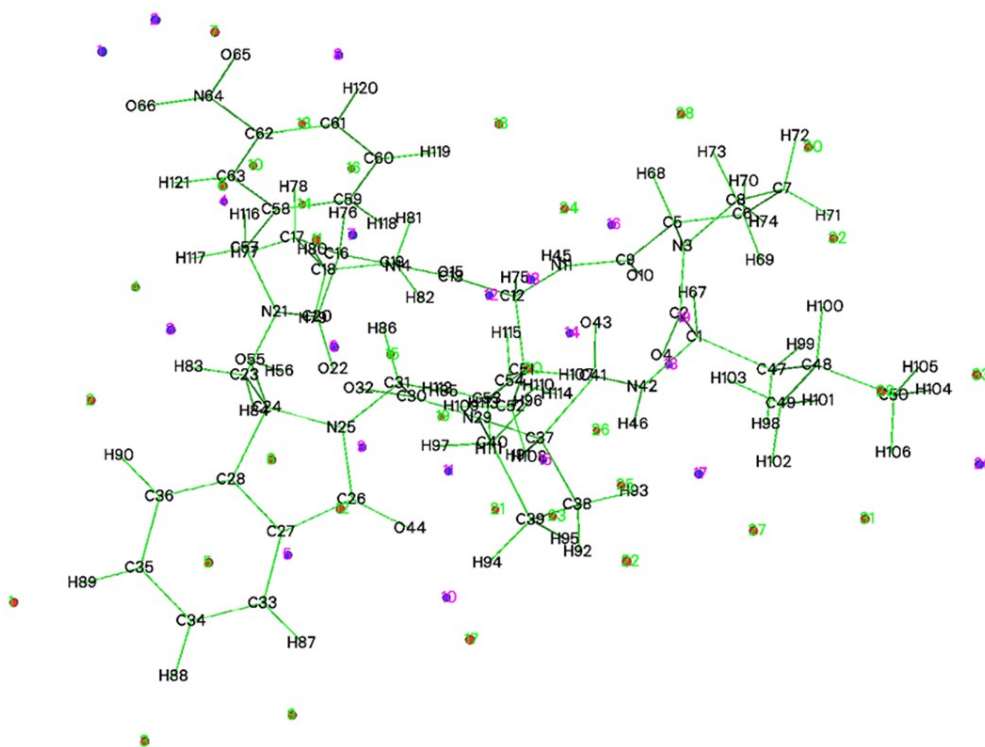

**Fig.S10.** Distribution of the surface electrostatic potential extreme of compound **19** with numbered atoms. The blue points with pink numbers represent the minimum extreme, and the red points with green number represent the maximum extreme.

**Table S4.** Electrostatic potential distribution diagram of compound **19**.

| Number of surface minima | Potential (kcal·mol <sup>-1</sup> ) | Number of surface maxima | Potential (kcal·mol <sup>-1</sup> ) | Number of surface maxima | Potential (kcal·mol <sup>-1</sup> ) |
|--------------------------|-------------------------------------|--------------------------|-------------------------------------|--------------------------|-------------------------------------|
| 1                        | -42.84                              | 1                        | 18.91                               | 21                       | -1.43                               |
| 2                        | -43.21                              | 2                        | 18.95                               | 22                       | 13.67                               |
| 3                        | -33.61                              | 3                        | 17.33                               | 23                       | -4.58                               |
| 4                        | 22.23                               | 4                        | 27.27                               | 24                       | 23.31                               |
| 5                        | -13.75                              | 5                        | -14.77                              | 25                       | 34.21                               |
| 6                        | -43.51                              | 6                        | -2.36                               | 26                       | -3.46                               |
| 7                        | -19.42                              | 7                        | 7.24                                | 27                       | 13.99                               |
| 8                        | -2.09                               | 8                        | -11.87                              | 28                       | 26.93                               |
| 9                        | -43.33                              | 9                        | 9.97                                | 29                       | 10.76                               |
| 10                       | -42.19                              | <b>*10</b>               | 35.31                               | 30                       | 24.88                               |
| 11                       | -25.42                              | 11                       | -17.15                              | 31                       | 12.57                               |
| 12                       | -24.66                              | 12                       | -9.26                               | 32                       | 28.06                               |
| 13                       | -43.37                              | 13                       | 29.11                               | 33                       | 12.52                               |
| 14                       | -3.13                               | 14                       | 25.32                               |                          |                                     |
| 15                       | -6.17                               | 15                       | -20.27                              |                          |                                     |
| 16                       | -3.32                               | 16                       | 28.24                               |                          |                                     |
| 17                       | 6.28                                | 17                       | 4.34                                |                          |                                     |
| 18                       | -47.05                              | 18                       | 16.13                               |                          |                                     |
| <b>*19</b>               | -49.73                              | 19                       | 7.13                                |                          |                                     |
| 20                       | 3.68                                | 20                       | 9.25                                |                          |                                     |

Note: The value in bold with \* indicates the maximum or minimum value

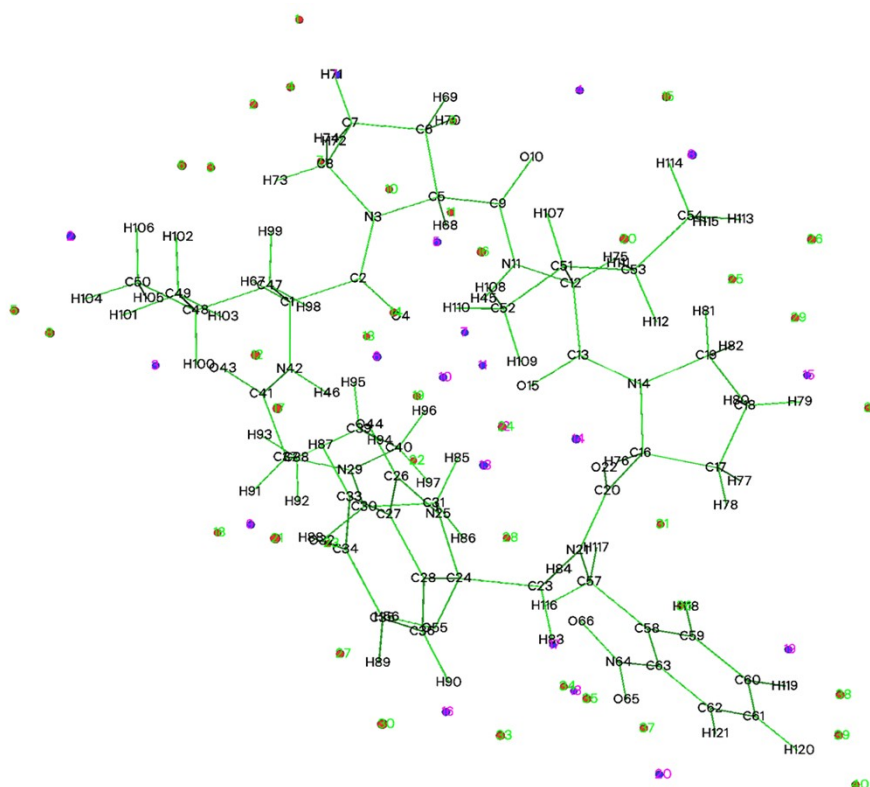

**Fig.S11.** Distribution of the surface electrostatic potential extreme of compound **20** with numbered atoms. The blue points with pink numbers represent the minimum extreme, and the red points with green number represent the maximum extreme.

**Table S5.** Electrostatic potential distribution diagram of compound **20**.

| Number of surface minima | Potential (kcal·mol <sup>-1</sup> ) | Number of surface maxima | Potential (kcal·mol <sup>-1</sup> ) | Number of surface maxima | Potential (kcal·mol <sup>-1</sup> ) |
|--------------------------|-------------------------------------|--------------------------|-------------------------------------|--------------------------|-------------------------------------|
| <b>1</b>                 | 6.81                                | <b>1</b>                 | 14.70                               | <b>21</b>                | 16.10                               |
| <b>2</b>                 | -6.76                               | <b>2</b>                 | 15.68                               | <b>22</b>                | 11.14                               |
| <b>3</b>                 | -51.19                              | <b>3</b>                 | 16.47                               | <b>23</b>                | 6.35                                |
| <b>4</b>                 | -47.28                              | <b>4</b>                 | 13.90                               | <b>24</b>                | -39.66                              |
| <b>5</b>                 | -16.60                              | <b>5</b>                 | -0.98                               | <b>25</b>                | 23.07                               |
| <b>6</b>                 | -40.20                              | <b>6</b>                 | 4.84                                | <b>26</b>                | 9.081                               |
| <b>7</b>                 | -28.01                              | <b>7</b>                 | 12.13                               | <b>27</b>                | 8.97                                |
| <b>8</b>                 | -4.43                               | <b>8</b>                 | 0.71                                | <b>28</b>                | 15.75                               |
| <b>* 9</b>               | -49.05                              | <b>9</b>                 | 11.07                               | <b>29</b>                | 22.99                               |
| <b>10</b>                | -57.72                              | <b>10</b>                | 10.66                               | <b>30</b>                | 19.52                               |
| <b>11</b>                | -32.13                              | <b>11</b>                | 10.10                               | <b>31</b>                | 31.04                               |
| <b>12</b>                | -42.55                              | <b>12</b>                | 0.57                                | <b>32</b>                | 26.21                               |
| <b>13</b>                | -22.01                              | <b>13</b>                | 0.49                                | <b>33</b>                | 20.86                               |
| <b>14</b>                | -41.13                              | <b>14</b>                | -19.63                              | <b>34</b>                | 20.24                               |
| <b>15</b>                | 18.16                               | <b>15</b>                | -1.48                               | <b>35</b>                | 21.77                               |
| <b>16</b>                | -25.06                              | <b>16</b>                | -2.60                               | <b>36</b>                | 22.93                               |
| <b>17</b>                | -30.34                              | <b>17</b>                | 7.60                                | <b>37</b>                | 11.51                               |
| <b>18</b>                | -32.10                              | <b>18</b>                | -2.24                               | <b>* 38</b>              | 34.18                               |
| <b>19</b>                | 12.14                               | <b>19</b>                | -38.87                              | <b>39</b>                | 32.47                               |
| <b>20</b>                | 6.99                                | <b>20</b>                | 0.66                                | <b>40</b>                | 32.37                               |

Note: The value in bold with \* indicates the maximum or minimum value

**Table S6.** Docking process parameter settings for those with relative high binding energy.

| Parameter       | Compound 1 | Compound 2 | Compound 3 | Compound 8 | Compound 14 | Compound 19 |
|-----------------|------------|------------|------------|------------|-------------|-------------|
| Grid box (nm)   | 40×40×40   | 40×40×40   | 40×40×40   | 40×40×40   | 40×40×40    | 40×40×40    |
| spacing         | 0.375      | 0.375      | 0.375      | 0.375      | 0.375       | 0.375       |
| grid center x   | -7.442     | -7.442     | -7.442     | -7.442     | -7.442      | -7.442      |
| grid center y   | 0.621      | 0.621      | 0.621      | 0.621      | 0.621       | 0.621       |
| grid center z   | 6.892      | 6.892      | 6.892      | 6.892      | 6.892       | 6.892       |
| GA runs         | 20         | 20         | 20         | 20         | 20          | 20          |
| population size | 150        | 150        | 150        | 150        | 150         | 150         |

**Table S7.** Drug-likeness prediction of compounds **1-24**

| Compounds           | Number of HBA | HBD | MolLogP | MolPSA (Å <sup>2</sup> ) | BBB Score | Drug-likeness model score |
|---------------------|---------------|-----|---------|--------------------------|-----------|---------------------------|
| Compound <b>1</b>   | 8             | 3   | 1.86    | 150.95                   | 1.00      | 0.36                      |
| Compound <b>2</b>   | 8             | 3   | 1.86    | 150.95                   | 1.00      | 0.36                      |
| Compound <b>3</b>   | 8             | 3   | 1.86    | 150.95                   | 1.00      | 0.36                      |
| Compound <b>4</b>   | 4             | 1   | 1.71    | 66.26                    | 3.55      | 0.22                      |
| Compound <b>5</b>   | 5             | 2   | 1.95    | 91.64                    | 2.11      | 0.47                      |
| Compound <b>6</b>   | 6             | 2   | 1.59    | 108.58                   | 1.64      | 0.47                      |
| Compound <b>7</b>   | 7             | 3   | 2.31    | 134.02                   | 1.00      | 0.36                      |
| Compound <b>8</b>   | 9             | 5   | 3.18    | 185.97                   | 0.20      | 0.3                       |
| Compound <b>9</b>   | 10            | 7   | 4.39    | 221.21                   | 0.00      | 0.3                       |
| Compound <b>10*</b> | -             | -   | -       | -                        | -         | -                         |
| Compound <b>11</b>  | 8             | 3   | 1.48    | 150.95                   | 1.00      | 0.49                      |
| Compound <b>12</b>  | 8             | 3   | 1.92    | 150.95                   | 1.00      | 0.88                      |
| Compound <b>13</b>  | 8             | 3   | 2.79    | 150.95                   | 1.00      | 0.44                      |
| Compound <b>14</b>  | 10            | 3   | 1.78    | 184.34                   | 1.00      | 0.18                      |
| Compound <b>15</b>  | 8             | 3   | 2.46    | 150.95                   | 1.00      | 0.49                      |
| Compound <b>16</b>  | 8             | 5   | 2.30    | 150.95                   | 1.00      | 0.47                      |
| Compound <b>17</b>  | 8             | 5   | 0.77    | 171.76                   | 1.17      | 0.51                      |
| Compound <b>18</b>  | 9             | 3   | 1.81    | 158.50                   | 1.00      | 0.54                      |
| Compound <b>19</b>  | 10            | 3   | 1.71    | 184.34                   | 1.00      | 0.24                      |
| Compound <b>20</b>  | 10            | 3   | 2.01    | 184.03                   | 1.00      | -0.07                     |
| Compound <b>21</b>  | 10            | 3   | 1.16    | 184.03                   | 1.00      | -0.29                     |
| Compound <b>22</b>  | 10            | 3   | 1.97    | 184.03                   | 1.00      | -0.31                     |
| Compound <b>23</b>  | 10            | 3   | 1.91    | 184.34                   | 1.00      | -0.06                     |
| Compound <b>24</b>  | 10            | 3   | 1.27    | 184.03                   | 1.00      | 0.12                      |

\* The druglikeness of compound 10 could be not predicted by MolSoft programme due to it large molecular weight.
